# Supplementary material for: Surface clean gold nanoflower obtained by complete removal of capping agents: an active catalyst for alcohol oxidation
Source: Royal Society of Chemistry journal article supplement (doi:10.1039/c5ra27146k), 2016-01-01
Supplement: c5ra27146k1.pdf [file c5ra27146k1.pdf]

## Electronic Supplementary Information

### Surface clean gold nanoflower obtained by complete removal of capping agent: active catalyst for alcohol oxidation

Yoshiro Imura<sup>\*a, b</sup>, Shinya Furukawa<sup>c</sup>, Kenichi Ozawa<sup>a</sup>, Clara Morita-Imura<sup>b</sup>,  
Takeshi Kawai<sup>b</sup>, and Takayuki Komatsu<sup>\*a</sup>

<sup>a</sup>Department of Chemistry and Material Science, Tokyo Institute of Technology, 2-12-1-E1-10 Ookayama, Meguro-ku, Tokyo 152-8551, Japan

<sup>b</sup>Department of Industrial Chemistry, Tokyo University of Science, 1-3 Kagurazaka, Shinjuku-ku, Tokyo 162-8601, Japan

<sup>c</sup>Department of Chemistry, Tokyo Institute of Technology, 2-12-1-E1-10 Ookayama, Meguro-ku, Tokyo 152-8551, Japan

imura@ci.kagu.tus.ac.jp, komatsu.t.ad@m.titech.ac.jp

**TEM-EDX measurement:** TEM-EDX spectra of Au NFs indicated that they were composed of pure gold. The Cu was from the TEM copper grid.

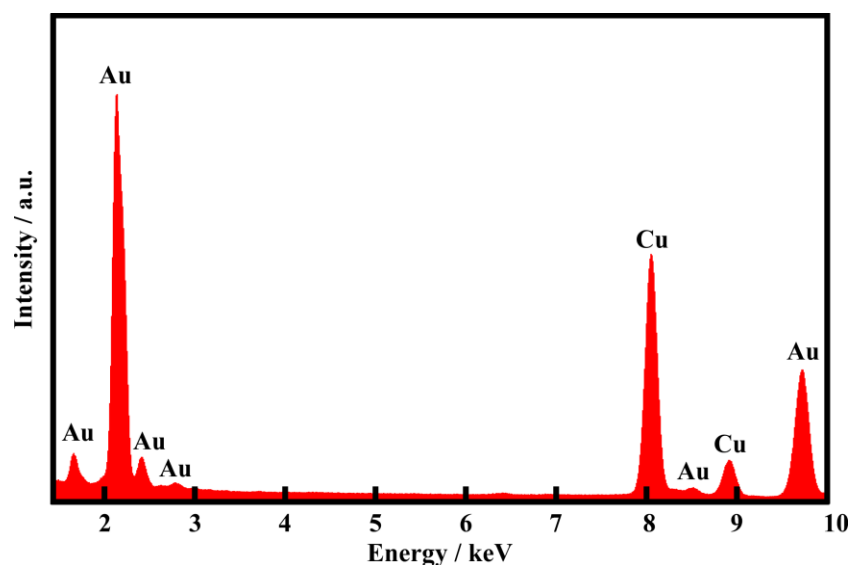

**Figure S1.** TEM-EDX spectra of Au NFs.

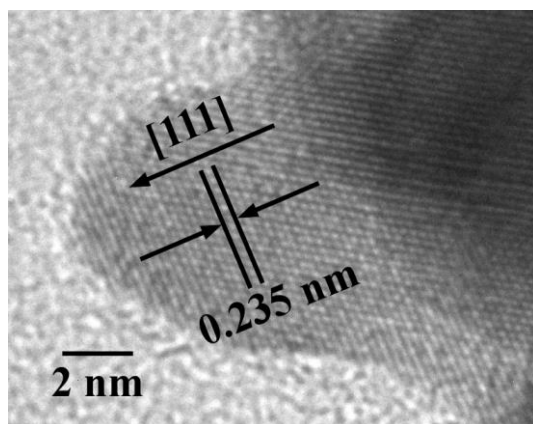

**Figure S2.** HR-TEM image of Au NFs.

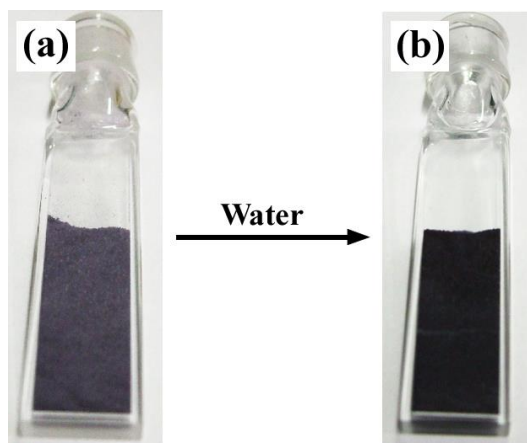

**Figure S3.** Photographic images of (a) dry and (b) wet powders of Au NFs/ $\gamma$ -Al<sub>2</sub>O<sub>3</sub>.

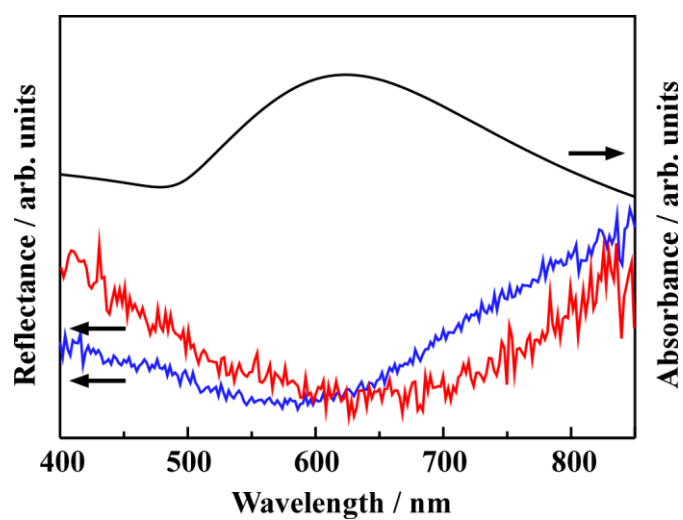

**Figure S4.** UV-vis absorption spectra of Au NFs dispersion (black line). UV-vis reflectance spectra of dry (blue line) and wet (red line) powders of Au NFs/ $\gamma$ -Al<sub>2</sub>O<sub>3</sub>, shown in Figure S3.

**TG-DTA measurement:** TG-DTA measurement was conducted using a SII TG/DTA 7200 instrument. The sample was heated from room temperature to 800°C at a rate of 10°C/min under a flow of air. The amounts of melamine was 1.4 mg.

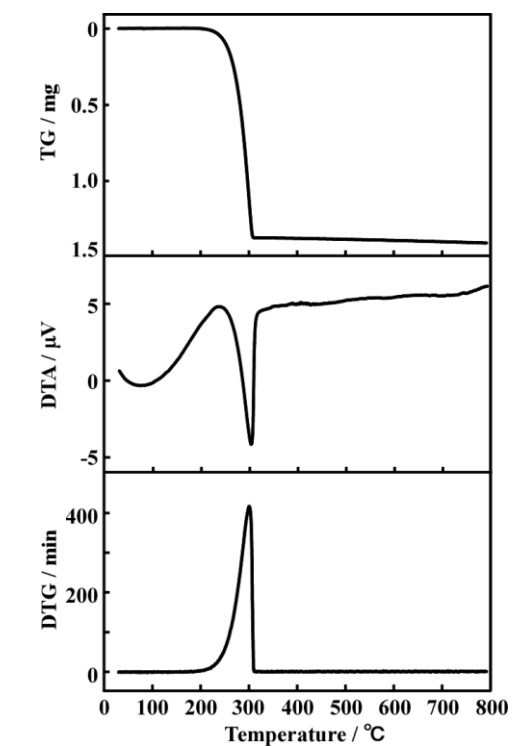

**Figure S5.** TG-DTA measurement of melamine.

## Calcination Procedure

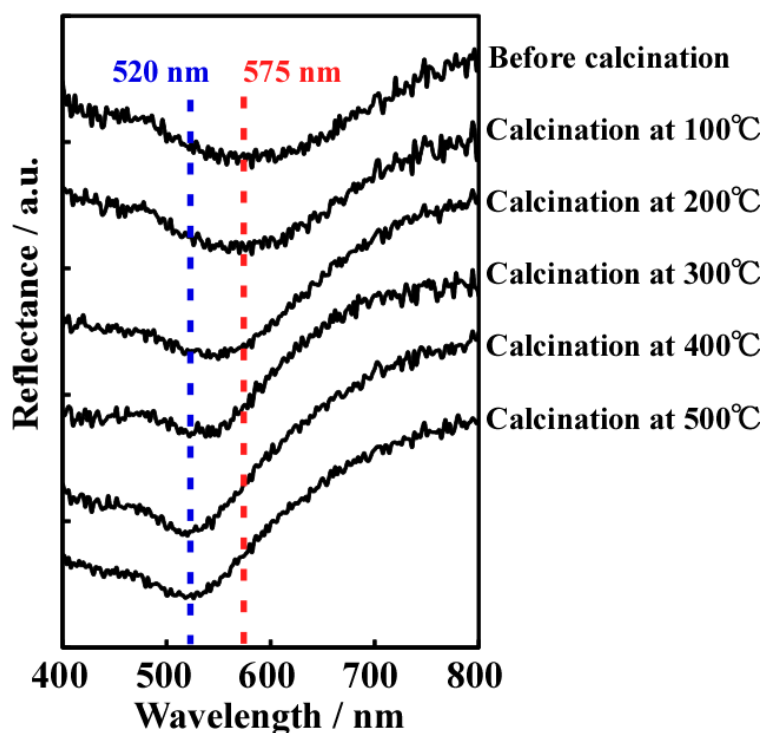

**Figure S6.** UV-vis reflectance spectra before and after calcination of Au NFs/ $\gamma$ -Al<sub>2</sub>O<sub>3</sub>. Red and blue dotted lines show 575 and 520 nm, respectively.

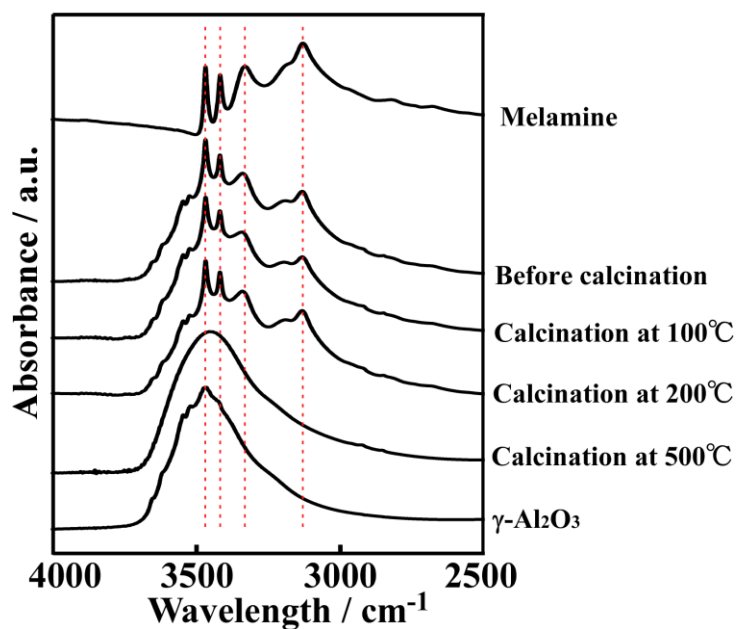

**Figure S7.** FT-IR spectra before and after calcination of Au NFs/ $\gamma$ -Al<sub>2</sub>O<sub>3</sub>. Red dotted lines represent melamine.

### **Melamine<sup>[1,2]</sup>**

3469 cm<sup>-1</sup>: NH<sub>2</sub> asymmetric stretching, 3418 cm<sup>-1</sup>: NH<sub>2</sub> asymmetric stretching,

3328 cm<sup>-1</sup>: NH<sub>2</sub> symmetric stretching, 3128 cm<sup>-1</sup>: N-H...N stretching

## Water extraction procedure

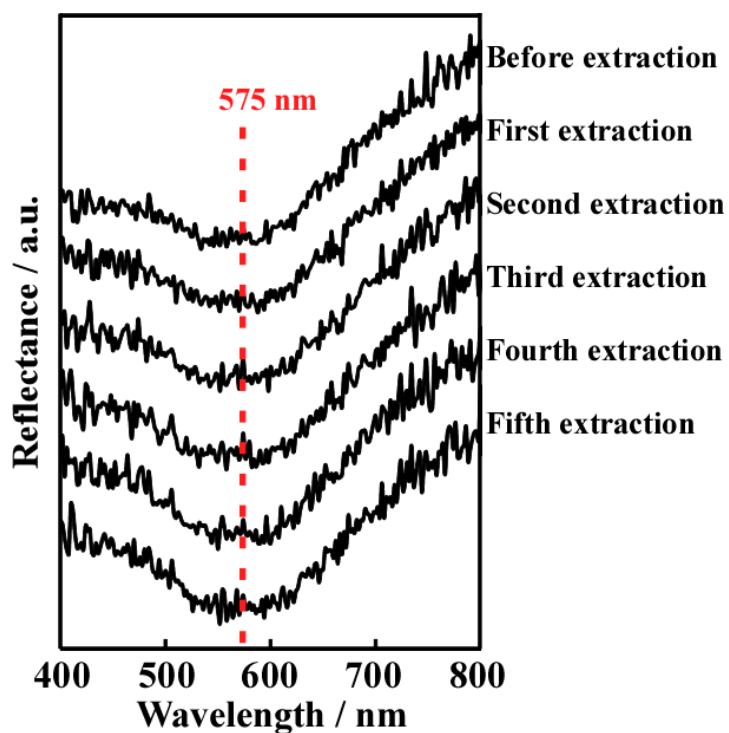

**Figure S8.** UV-vis spectra of Au NFs/ $\gamma$ -Al<sub>2</sub>O<sub>3</sub> before and after water extraction procedure. The red dotted line is at 575 nm.

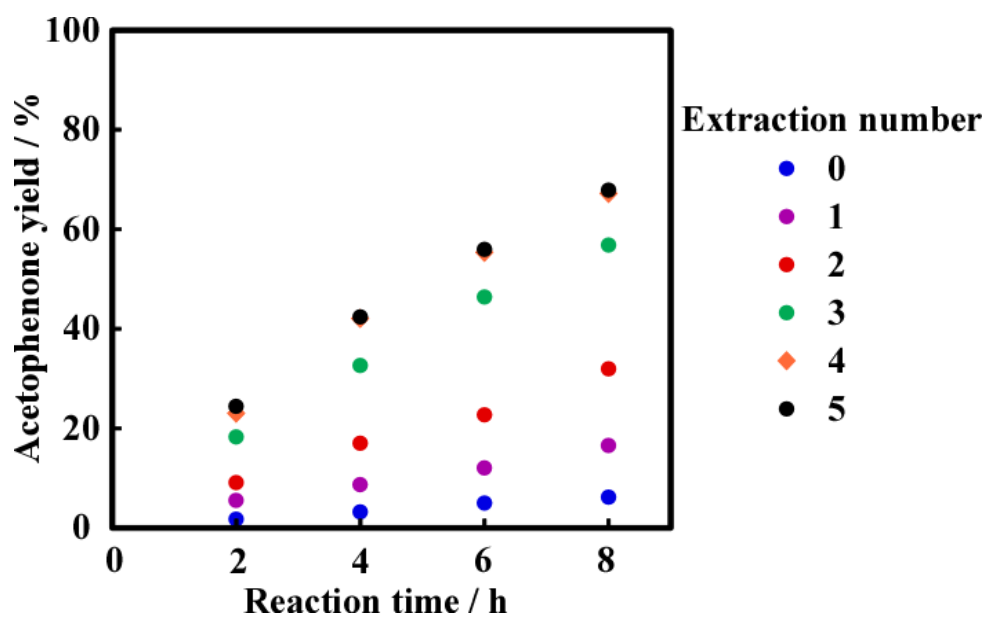

**Figure S9.** Effect of the number of extractions on acetophenone yield.

**Table S1.** Catalytic performance of Au NFs/ $\gamma$ -Al<sub>2</sub>O<sub>3</sub> before and after extraction in oxidation of 1-phenylethyl alcohol.

| Number of extractions | 1-PA conversion / % | AP yield / mol% |
|-----------------------|---------------------|-----------------|
| 0                     | 10                  | 6               |
| 1                     | 22                  | 17              |
| 2                     | 36                  | 32              |
| 3                     | 61                  | 57              |
| 4                     | 70                  | 67              |
| 5                     | 72                  | 68              |

Reaction conditions: 1-phenylethyl alcohol (15  $\mu$ mol), catalyst (50 mg), K<sub>2</sub>CO<sub>3</sub> (0.1 g), water (10 g), Air (1 atm), 60°C, 8 h.

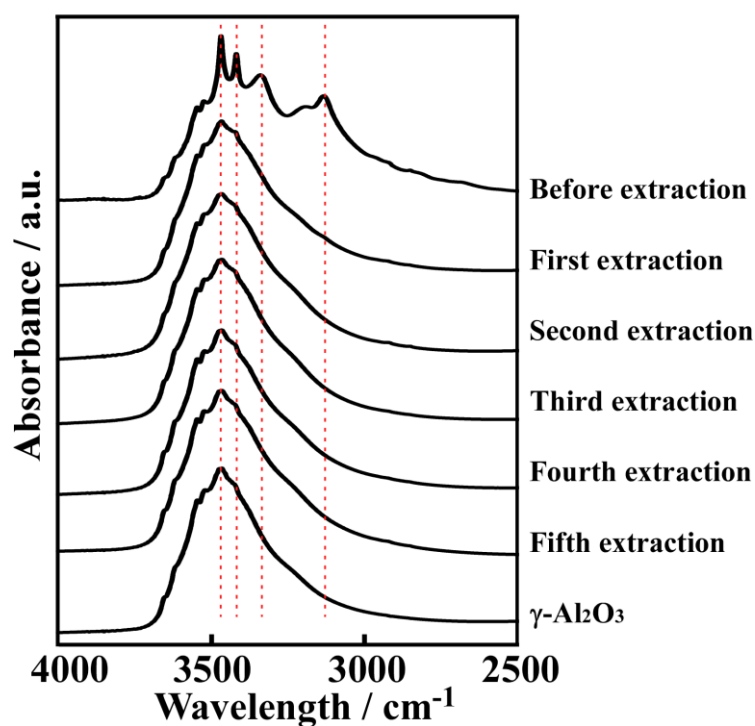

**Figure S10.** FT-IR spectra of Au NFs before and after water extraction procedure. Red dotted lines represent melamine.

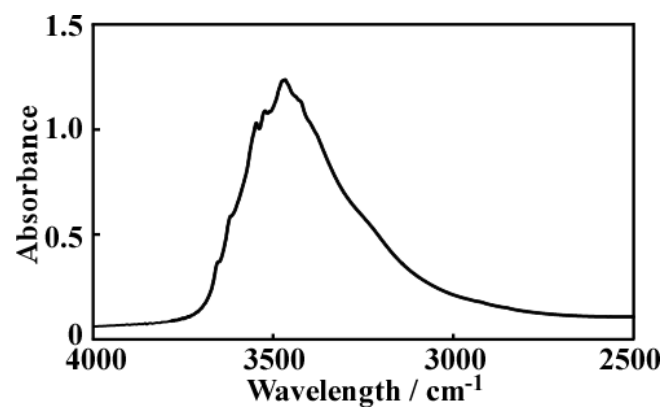

Figure S11. FT-IR spectra of Au NPs after heating washed Au NFs.

Reference

[1] M. K. Marchewka, *Mater. Sci. Eng. B* 2002, **95**, 214-221.

[2] W. J. Jones, W. J. Orville-Thomas, *Trans. Faraday Soc.* 1959, **55**, 203-210.
